1 **Structurally complex osteosarcoma genomes exhibit limited heterogeneity within**  
2 **individual tumors and across evolutionary time**

3 Sanjana Rajan<sup>1,2\*</sup>, Simone Zaccaria<sup>3,4,5\*</sup>, Matthew V. Cannon<sup>2\*</sup>, Maren Cam<sup>2</sup>, Amy C.  
4 Gross<sup>2</sup>, Benjamin J. Raphael<sup>3,6#</sup>, Ryan D. Roberts<sup>2,7,8#</sup>

5 1. Molecular, Cellular, and Developmental Biology Program, The Ohio State  
6 University, Columbus, Ohio, USA.

7 2. Center for Childhood Cancers and Blood Diseases, Abigail Wexner Research  
8 Institute at Nationwide Children's Hospital, Ohio, USA.

9 3. Department of Computer Science, Princeton University, Princeton, NJ, USA.

10 4. Computational Cancer Genomics Research Group, University College London  
11 Cancer Institute, London, UK

12 5. Cancer Research UK Lung Cancer Centre of Excellence, University College  
13 London Cancer Institute, London, UK

14 6. Rutgers Cancer Institute of New Jersey, New Brunswick, NJ, USA.

15 7. The Ohio State University James Comprehensive Cancer Center, Columbus,  
16 Ohio, USA.

17 8. Division of Pediatric Hematology, Oncology, and BMT, Nationwide Children's  
18 Hospital, Columbus, Ohio, USA

19 \*Contributed equally

20 #Contributed equally

21 **Correspondence:** Ryan D. Roberts

22 **Email:** [Ryan.Roberts@nationwidechildrens.org](mailto:Ryan.Roberts@nationwidechildrens.org)

23 **Running Title:** Complex but stable copy-number profiles in osteosarcoma

24 **Author Contributions:** S.R., S.Z., M.V.C, B.J.P. and R.D.R. designed research, M.C.,  
25 A.C.G., M.V.C. and S.R. performed research, S.Z. and M.V.C. analyzed the data. S.R.  
26 and S.Z. wrote the paper, S.R., S.Z., M.V.C., B.J.P. and R.D.R. edited the paper.

27 **Competing Interest Statement:** The authors declare no potential conflicts of interest.

28 **Keywords:** Osteosarcoma, heterogeneity, somatic copy number aberration

## 29 **Abstract**

30 Osteosarcoma is an aggressive malignancy characterized by high genomic complexity.  
31 Identification of few recurrent mutations in protein coding genes suggests that somatic  
32 copy-number aberrations (SCNAs) are the genetic drivers of disease. Models around  
33 genomic instability conflict - it is unclear if osteosarcomas result from pervasive ongoing  
34 clonal evolution with continuous optimization of the fitness landscape or an early  
35 catastrophic event followed by stable maintenance of an abnormal genome. We address  
36 this question by investigating SCNAs in >12,000 tumor cells obtained from human  
37 osteosarcomas using single cell DNA sequencing, with a degree of precision and  
38 accuracy not possible when inferring single cell states using bulk sequencing. Using the  
39 CHISEL algorithm, we inferred allele- and haplotype-specific SCNAs from this whole-  
40 genome single cell DNA sequencing data. Surprisingly, despite extensive structural  
41 complexity, these tumors exhibit a high degree of cell-cell homogeneity with little sub-  
42 clonal diversification. Longitudinal analysis of patient samples obtained at distant  
43 therapeutic time points (diagnosis, relapse) demonstrated remarkable conservation of  
44 SCNA profiles over tumor evolution. Phylogenetic analysis suggests that the majority of  
45 SCNAs were acquired early in the oncogenic process, with relatively few structure-  
46 altering events arising in response to therapy or during adaptation to growth in  
47 metastatic tissues. These data further support the emerging hypothesis that early

48 catastrophic events, rather than sustained genomic instability, give rise to structural  
49 complexity, which is then preserved over long periods of tumor developmental time.

## 50 **Significance Statement**

51 Chromosomally complex tumors are often described as genomically unstable. However,  
52 determining whether complexity arises from remote time-limited events that give rise to  
53 structural alterations or a progressive accumulation of structural events in persistently  
54 unstable tumors has implications for diagnosis, biomarker assessment, mechanisms of  
55 treatment resistance, and represents a conceptual advance in our understanding of  
56 intra-tumoral heterogeneity and tumor evolution.

## 57 **Introduction**

58 Osteosarcoma is the most common primary bone tumor affecting children and  
59 adolescents<sup>1</sup>. Nearly always high grade and aggressive, this disease exhibits extensive  
60 structural variation (SV) that results in a characteristically chaotic genome<sup>2-4</sup>. With few  
61 recurrent point mutations in protein coding regions, osteosarcoma genomes often exhibit  
62 widespread structural complexity, giving rise to associated somatic copy-number  
63 aberrations (SCNAs), a likely genomic driver of malignant transformation<sup>5</sup>. Indeed,  
64 osteosarcoma is the prototype tumor whose study led to the discovery of  
65 chromothripsis<sup>6,7</sup>, a mutational process that causes the shattering of chromosomes  
66 leading to localized genomic rearrangements causing extreme chromosomal  
67 complexity<sup>8</sup>. However, genomic complexity in osteosarcoma often goes beyond  
68 alterations caused by the canonical processes associated with chromothripsis<sup>9,10</sup>. Many  
69 have reasonably interpreted chromosomal complexity to be evidence of sustained  
70 chromosomal instability (CIN), often with supporting evidence from other cancer types<sup>11-</sup>

71 <sup>14</sup>. Indeed, cancer sequencing studies have identified the presence of extensive SCNAs  
72 as a marker for CIN<sup>13</sup>.

73 Two distinct models have been proposed to explain the evolution of chromosomal  
74 structure and copy numbers in cancer genomes. One model suggests that underlying  
75 genomic instability gives rise to populations of cells with diverse phenotypic variations  
76 and that ongoing selection of advantageous phenotypes drives evolution and  
77 adaptation<sup>15,16</sup>. A somewhat competing model argues that discrete periods of genomic  
78 instability, isolated in tumor developmental time, give rise to extreme chromosomal  
79 complexity driven by a small number of impactful catastrophic events<sup>17,18</sup>. In  
80 osteosarcoma, investigators have put forward data that would seem to support both  
81 models. For instance, several groups have used single cell RNA sequencing  
82 experiments, which reveal a high degree of transcriptional heterogeneity, to infer a high  
83 degree of copy number heterogeneity within osteosarcoma tumors<sup>19,20</sup>, an observation  
84 which would support a malignant process driven by ongoing instability and gradual  
85 evolution. However, others have shown that SCNA profiles differ little when comparing  
86 primary to metastatic or diagnostic to relapse samples<sup>5,21,22</sup>, which would suggest that  
87 ongoing mechanisms of malignancy do not create an environment of chromosomal  
88 instability. Overall, it remains unclear whether the structurally complex genomes  
89 characteristic of osteosarcoma emerge from continuous cycles of diversification and  
90 fitness optimization within a context of ongoing instability and significant intra-tumoral  
91 chromosomal heterogeneity or from an early catastrophic event that gave rise to  
92 widespread structural changes that are then maintained over long periods of tumor  
93 development, with evidence from the literature supporting both potential mechanisms.

94 One challenge in addressing this question comes from challenges in data interpretation  
95 and deconvolution, as the existing studies describing copy number clonality and

96 evolution have inferred cell-specific copy number states from bulk tumor sequencing,  
97 often from a single time point<sup>23</sup>. However, investigating ongoing clonal evolution from  
98 bulk sequencing data remains particularly challenging, as each bulk tumor sample is an  
99 unknown mixture of millions of normal and cancer cells<sup>24–27</sup>. The emergence of single  
100 cell genomic DNA sequencing technologies now permits scalable and unbiased whole-  
101 genome single cell DNA sequencing of thousands of individual cells in parallel<sup>24,28</sup>,  
102 providing an ideal framework for analyzing intra-tumor genomic heterogeneity and SCNA  
103 evolution. Complementing these technical developments, recent computational  
104 advances – most notably the CHISEL algorithm<sup>27</sup> – enable highly accurate ploidy  
105 estimates and the inference of allele- and haplotype-specific SCNAs in individual cells  
106 and sub-populations of cells from low coverage single cell DNA sequencing. This allows  
107 cell-by-cell assessment of intra-tumoral SCNA heterogeneity, identification of allele-  
108 specific alterations and reconstruction of the evolutionary history of a tumor from  
109 thousands of individual cancer cells obtained at a single or multiple time points during  
110 tumor progression.

111 Here, we leverage these approaches to determine whether the widespread SCNAs in  
112 osteosarcoma result from ongoing genomic instability, providing a mechanism for tumor  
113 growth and evolution. Using expanded patient tissue samples, our studies revealed  
114 widespread aneuploidy and SCNAs in 12,019 osteosarcoma cells from ten tumor  
115 samples. Using this approach, we found negligible intra-tumor genomic heterogeneity,  
116 with remarkably conserved SCNA profiles when comparing either the individual cells  
117 within a tumor or tumors collected at different therapeutic time points from the same  
118 patient. These findings suggest that the widespread patterns of genomic SVs in  
119 osteosarcoma are likely acquired early in tumorigenesis, and the resulting patterns of

120 SVs and SCNAs can be preserved within an individual tumor, across treatment time and  
121 through the metastatic bottleneck.

## 122 **Results**

### 123 **Individual cells within osteosarcoma tumors exhibit extensive SCNAs, but a high** 124 **degree of homogeneity**

125 Single cell DNA sequencing was performed on 12,019 tumor cells from expanded  
126 patient tissue samples. These nine patient tissues were obtained from diagnostic  
127 biopsies of localized primary tumors ( $n = 3$ ), from post-chemotherapy resection  
128 procedures ( $n = 2$ ), or from relapsed metastatic lung lesions ( $n = 4$ ), representing a  
129 spectrum of disease progression (Supplemental **Table S1**, Supplemental **Table S2**).  
130 Apart from OS-17, a well-established model of metastatic osteosarcoma<sup>29</sup>, all patient  
131 tissues were expanded for a single passage in mice as either subcutaneous flank or  
132 orthotopic bone tumors to obtain fresh tissue to perform single cell DNA sequencing  
133 (300-2,500 single cells per sample; Supplemental **Figure S1A**). Previous studies have  
134 shown that this procedure yields samples with a high degree of fidelity relative to the  
135 diagnostic specimens, especially in early passages, an observation that we also  
136 validated in our own samples<sup>30</sup>. We then used CHISEL<sup>27</sup> to identify allele- and  
137 haplotype-specific SCNAs from the sequencing data.

138 Consistent with previous reports<sup>6,31</sup>, sequencing showed a high degree of aneuploidy  
139 and extensive SCNAs across the entire osteosarcoma genome (Figure 1). If driven by a  
140 process of chromosomal instability and ongoing/continuous clonal evolution, we would  
141 expect to observe multiple subclones with distinct complements of SCNAs within each  
142 same tumor, such as has been shown in recent single cell studies of other cancer  
143 types<sup>24,27,32</sup>. However, in each of the ten samples investigated, we identified one

144 dominant clone that comprised nearly all cells within each sample, with many samples  
 145 composed entirely of a single clone (Supplemental **Figure S1B**). To ensure that our  
 146 results were not an artifact caused by the algorithm or the selected thresholds for noise  
 147 control, we confirmed that the cells discarded as poor quality/noisy by CHISEL bear  
 148 SCNAs similar to the dominant clones identified in each sample – thus no rare clones  
 149 with distinct copy number profiles were discarded inappropriately (Supplemental **Figure**  
 150 **S2**). Interestingly, we found that a substantial fraction of the overall copy-number  
 151 changes involved allele-specific SCNAs, including copy-neutral LOHs (i.e., allele-specific  
 152 copy numbers {2, 0}) that would have been missed by previous analyses of total copy  
 153 numbers.

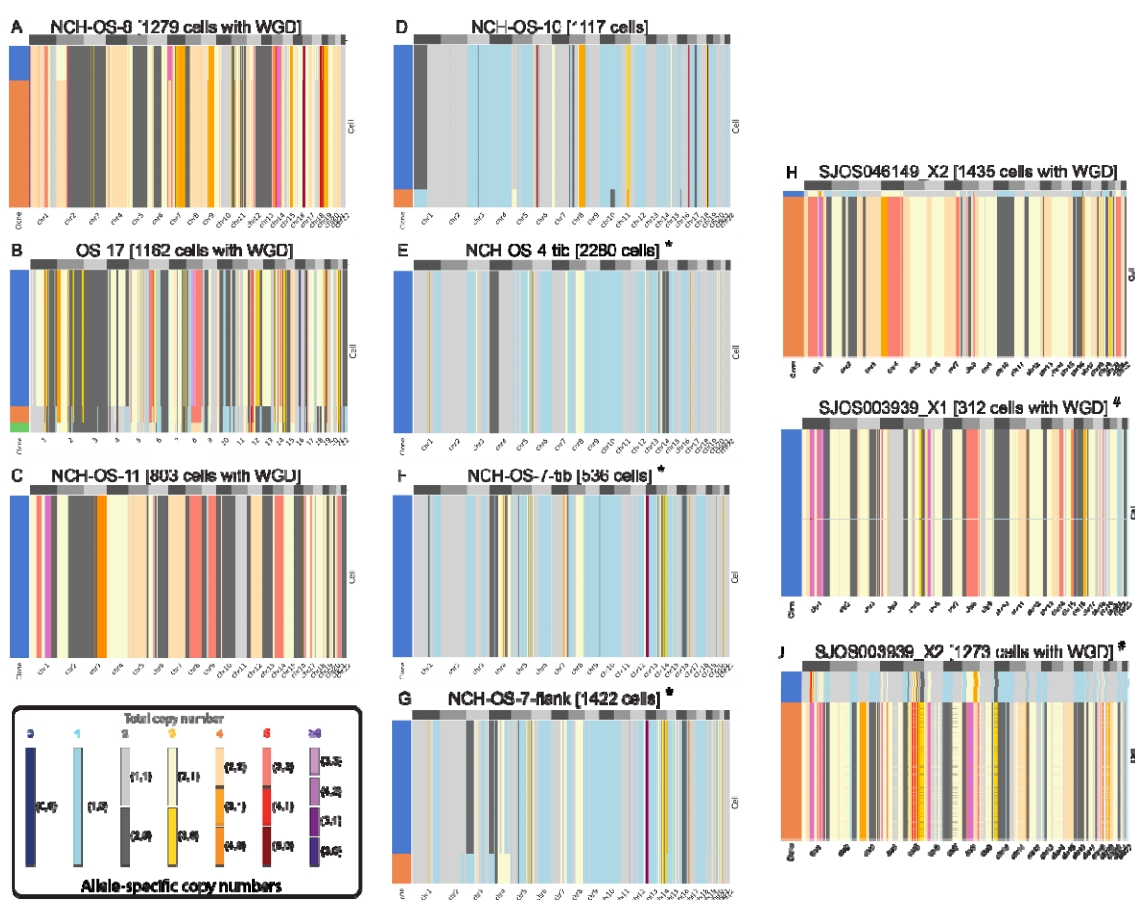

**Figure 1. Extensive genomic complexity in ten expanded osteosarcoma patient tissue samples using single cell DNA sequencing.** Allele-specific copy numbers (heatmaps colors) are inferred by using the CHISEL algorithm<sup>27</sup> from each of ten datasets including 300-2300

single cancer cells from osteosarcoma tumors. In each dataset, cancer cells are grouped into clones (colors in leftmost column) by CHISEL based on the inferred allele-specific copy numbers. Corrected allele-specific copy-numbers are correspondingly obtained by consensus. Note that cells classified as noisy by CHISEL have been excluded. '\*' and '#' represent samples obtained from the same patient.

154 Genome-wide ploidy of single cells showed high variability across samples, ranging from  
155 1.5 to 4, demonstrating a high degree of aneuploidy (Supplemental **Figure S3**).  
156 Consistent with the high levels of aneuploidy, we identified the presence of whole-  
157 genome doubling (WGD, a phenomenon identified with much greater precision in the  
158 single cell data) across nearly all cancer cells of six tumors (NCH-OS-8, OS-17, NCH-  
159 OS-11, SJOS046149\_X2, SJOS003939\_X2 and SJOS003939\_X1; **Figure 1 A-C, H-J**).  
160 One tumor (SJOS003939\_X2) shows two subclones that appear to be undergoing whole  
161 genome duplication, with one subclone exhibiting a SCNA pattern that is almost exactly  
162 double that of the other, across the genome.

163 To further assess tumor stability, we used paired datasets from patients collected at time  
164 points along tumor progression. We observed that whole-genome copy-number profiles  
165 were highly consistent within each patient. The first set includes NCH-OS-4, which was  
166 obtained shortly after diagnosis at the time of resection (after two rounds of neoadjuvant  
167 MAP chemotherapy), and NCH-OS-7, which was obtained at the time of relapse the  
168 following year. Comparing genomic windows where at least one sample had a SCNA in  
169 the primary clone, 77-78% of genomic windows had identical copy number assignments  
170 in both samples, despite variation in tumor purity (**Supplemental Figure S4**). This  
171 contrasts with between 1% and 35% concordance for non-related samples. The  
172 correlation between related samples may be even higher, given inaccuracies expected  
173 from low-coverage single cell SCNA detection.

174 The second set of paired primary and metastatic lesions (SJOS003939\_X1,  
175 SJOS003939\_X2) also showed SCNA profiles that were highly similar (58% of SCNAs



176 identical, **Supplemental Figure S4**), suggesting a high degree of conservation of  
177 genomic aberration profiles over therapeutic time. Overall, we observed a very high  
178 degree of homogeneity within cancer cells sequenced from the same tumor. Even in  
179 tumors where small proportions of cells (5-20%) are classified as part of small  
180 subclones, these sub-clonal cells are only distinguished by modest SCNAs differences  
181 within a few chromosomes. The exception to this general observation arose in  
182 SJOS003939\_X2, a second xenograft from a patient with a germline TP53, raising  
183 suspicion for a second malignancy (rather than a relapse). Thus, despite the high levels  
184 of aneuploidy and massive SCNAs identified in all ten samples, these osteosarcoma  
185 cells demonstrated very modest levels of intra-tumor heterogeneity and variation across  
186 therapeutic time.

#### 187 **Osteosarcoma cells harbor extensive SCNAs that mostly correspond to deletions.**

188 The occurrence of WGD events correlates with high levels of aneuploidy and higher  
189 frequency of SCNAs<sup>33</sup>. Recent reports have identified that WGDs serve as a  
190 compensatory mechanism for cells to mitigate the effects of deletions<sup>34</sup>. We investigated  
191 cell ploidy and fraction of genome affected by SCNAs (aberrant), amplifications,  
192 deletions, and sub-clonal CNAs between tumors affected by WGDs (NCH-OS-8, OS-17,  
193 NCH-OS-11, SJOS046149\_X2, SJOS003939\_X2 and SJOS003939\_X1) and tumors not  
194 affected by WGDs (NCH-OS-10, NCH-OS-4 and NCH-OS-7). Osteosarcoma cells in all  
195 analyzed tumors demonstrate extensive SCNAs, affecting more than half of the genome  
196 in every tumor cell. We found that the fraction of genome affected by SCNAs ranged  
197 from 50-70% on average (**Figure 2A**, **Supplemental Figure S5A**). This result might not  
198 be surprising for tumors affected by WGDs, however, we observed that tumors not  
199 affected by WGD had a high fraction of aberrant genome as well (higher than 50% on

200 average; **Figure 2A**). This aberrant fraction is substantially higher than has been  
201 reported for other cancer types<sup>33</sup>.

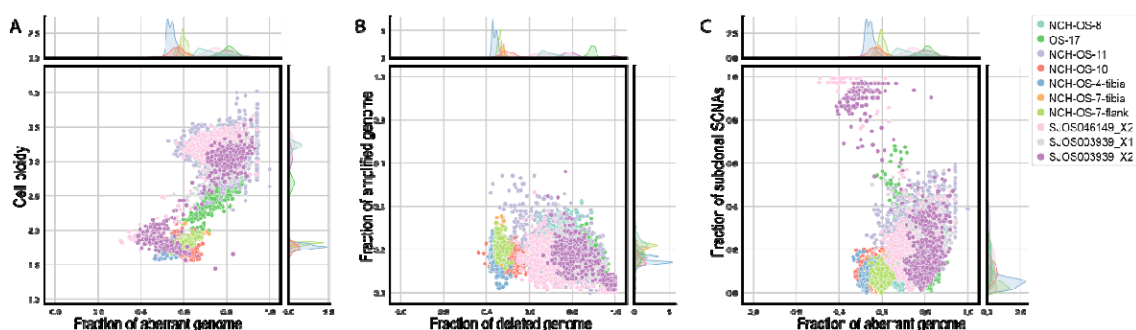

**Figure 2. Osteosarcoma cancer cells exhibit extensive genetic alterations, especially deletions, but a relatively low level of heterogeneity.** (A) Ploidy (y-axis) and fraction of aberrant genome (x-axis) of every cell (point) across the ten analyzed datasets (colors). The kernel density of the marginal distributions of each value is reported accordingly in every plot. (B) Fraction of genome affected by deletions (x-axis) vs. fraction of genome affected by amplifications (y-axis) of every cell (point) across the ten analyzed datasets (colors). (C) Fraction of aberrant genome (x-axis) and fraction of sub-clonal SCNAs (i.e. fraction of the genome with SCNAs different than the most common clone for the same region across all cells in the same dataset, y-axis) of every cell (point) across the ten analyzed datasets (colors).

202 We observed a clear enrichment of deletions among the identified SCNAs across all  
203 cancer cells. The fraction of genome affected by amplifications is 0-40% on average in  
204 every tumor, while the fraction of the genome affected by deletions is 40-100% on  
205 average across all cancer cells in every tumor (**Figure 2B**). This result is not particularly  
206 surprising for tumors with WGD events and is consistent with a recent study of Lopez et  
207 al.<sup>34</sup> that demonstrated a similar correlation in non-small-cell lung cancer patients.  
208 However, in the osteosarcoma tumors analyzed in this study, we found that cancer cells  
209 in non-WGD tumors are similarly affected by a high fraction of deletions (**Figure 2B**).  
210 Importantly, we observed that >80% of the cells in all but two of our samples harbored  
211 LOH events at the TP53 locus (in-line with frequency previously reported<sup>3</sup>)  
212 (**Supplemental Figure S5**). This substantiates the correlation between LOH of TP53  
213 and high levels of genomic instability (including the occurrence of WGDs) reported in  
214 recent studies<sup>13,34,35</sup>, and suggests that these events might have a critical role in the

215 maintenance of a highly aberrant genomic state. Notably, CHISEL identified 50% of the  
216 samples to harbor copy-neutral LOH alterations at the TP53 locus that would be missed  
217 by total copy number analyses (**Supplemental Figure S5**).

218 We found it interesting that sub-clonal SCNAs that likely occurred late in the evolutionary  
219 process (present only in subpopulations of cancer cells) are relatively rare across all  
220 analyzed osteosarcoma tumors, irrespective of WGD status (with a frequency of 0-20%  
221 in most cancer cells; **Figure 2C, Supplemental Figure S5**). Note the only exceptions to  
222 this observation correspond to cells in NCH-OS-11, a sample with overall higher noise  
223 and variance, and a subpopulation of cells in two other tumors (SJOS046149\_X2 and  
224 SJOS003939\_X2) that appear to be cells that have not undergone WGD (**Supplemental**  
225 **Figure S5B**). Indeed, the average fraction of SCNAs in SJOS046149\_X2,  
226 SJOS003939\_X2 is lower than 20%. Overall, we observed that osteosarcoma cells  
227 investigated in these ten samples, whether passaged in cell culture over a few  
228 generations (OS-17), treatment naïve or exposed to extensive chemotherapy, bear high  
229 levels of aneuploidy marked with extensive deletions and negligible sub-clonal  
230 diversification, irrespective of WGD status.

### 231 **Longitudinal single cell sequencing shows modest evolution of SCNA from** 232 **diagnosis to relapse**

233 Increased aneuploidy has previously been associated with chromosomal instability (CIN)  
234 and accelerated tumor evolution<sup>13,36</sup>, though some have suggested that this observation  
235 specifically applies to tumors that exhibit not only high levels of SCNA, but also high  
236 levels of sub-clonal SCNA<sup>37</sup>. To assess the degree of structural instability exhibited by  
237 these tumors, we examined a pair of samples, NCH-OS-4 and NH-OS-7, collected at  
238 diagnosis and at relapse respectively, from the same patient to determine whether

239 SCNAs remained stable over therapeutic time or showed signs of significant  
240 instability/evolution. This included an expansion in both the flank and orthotopic tibia  
241 locations to determine whether these environments drove a niche-specific expansion of  
242 a selected clone. Results suggest that expansion in mouse did not lead to evolutionary  
243 disequilibrium.

244 We used CHISEL to jointly analyze 4,238 cells from these paired tumor samples and to  
245 infer corresponding allele- and haplotype-specific SCNAs (**Figure 3A**). Based on  
246 existing evolutionary models for SCNAs, we reconstructed a phylogenetic tree that  
247 describes the evolutionary history of the different tumor clones identified in these tumors  
248 (**Figure 3B**). The result from this phylogenetic analysis confirmed our findings in two  
249 ways. First, we found that the evolutionary ordering of the different clones in the  
250 phylogenetic tree is concordant with the longitudinal ordering of the corresponding  
251 samples (**Figure 3B**): the tumor clones identified in the early sample (NCH-OS-4)  
252 correspond to ancestors of all the other tumor clones identified in later samples (NCH-  
253 OS-7-tib and NCH-OS-7-flank). Second, we observed that the vast majority of SCNAs  
254 accumulated during tumor evolution are truncal, indicating that these aberrations are  
255 accumulated early during tumor evolution and shared across all the extant cancer cells  
256 (**Figure 3B**). In fact, only three significant events distinguish the most common ancestor  
257 of all cells from this patient (identified in NCH-OS-4) from the cells within the relapse  
258 lesion: gain of chromosome 14, gain of chromosome 16q (resulting in copy-neutral  
259 LOH), and deletion of one allele of chromosome 18 (resulting in LOH). Note that we  
260 cannot be certain of when these clones arose. It is possible these changes occurred  
261 early in tumor formation and were present in the primary tumor but were not present in  
262 the biopsied sample and so we must exercise caution when assessing if there is ongoing  
263 low-level chromosomal instability.

264 To further assess the effects that environmental stressors might play on the creation  
265 and/or emergence of sub-dominant clones, which could be masked due to extreme  
266 rarity, we expanded samples from the same tumor within two different  
267 microenvironments in mice. Consistent with the diagnosis-relapse sample comparison,  
268 clones identified within tumors grown orthotopically within the tibia (NCH-OS-7-tib) or  
269 within subcutaneous flank tissues (NCH-OS-7-flank) are highly concordant (78% of  
270 genomic windows called with identical SCNA values) and distinguished by few focal  
271 SCNAs (primarily single copy changes). These changes could be either be variance in  
272 SCNA calling from the sequencing data, stochastic differences caused by the presence  
273 of sub-clones within the original tumor sample that was bisected and implanted or  
274 biologically relevant. Without targeted studies it is not possible to confidently define the  
275 biological role of these focal changes, if any. A third comparison of tumors separated in  
276 time and space was possible using another paired set of primary and metastatic lesions  
277 (SJOS003939\_X1, SJOS003939\_X2), which also demonstrated negligible sub-clonal  
278 diversification (**Supplemental Figure S7**). Indeed, each sample was dominated by one  
279 major clone, which exhibited only subtle differences from the paired sample. While these  
280 results do not suggest the absence of SCNA changes over the course of tumor  
281 evolution, they do suggest a level of stability quite similar to genomically simple tumors  
282 and that the mechanisms giving rise to these limited focal changes are different from  
283 those that gave rise to widespread genomic complexity.

284 To further explore temporal and spatial consistency of patient tumor samples, we  
285 combined whole genome sequencing data obtained from paired osteosarcoma samples  
286 within the St. Jude database<sup>38–40</sup> with our own whole genome sequencing and performed  
287 SCNA analysis. This combined data yielded between two and six tumor samples for  
288 each patient, in addition to a germline reference sample. In most cases, all samples

289 taken from a single patient at different timepoints were highly similar and clustered  
290 together (**Figure 4** and **Supplemental Figure S8A-K**). There were, however, five  
291 samples that had more than one distinct clone in separately collected samples which  
292 reduced the overall average. In these instances, the average correlation between clonal  
293 populations within a patient was only 0.28, which was close to the correlation we  
294 observed between samples taken from different patients (mean Pearson cor = 0.18).  
295 Deeper exploration of these samples revealed germline TP53 mutations in some  
296 patients (shown with a red asterisk in **Figure 4**), suggesting an underlying cancer  
297 predisposition and a likelihood that these are tumors arising from distinct oncogenic  
298 events. The correlation within a clone was very high (mean Pearson cor = 0.67), despite  
299 the noise created by the sparse coverage sequencing inherent to this method.  
300 Xenograft-derived samples did not cluster separately from samples derived directly from  
301 patients (**Figure 4**), except for two samples from SJOS030645 which formed a distinct  
302 cluster. The xenograft samples had a high correlation with non-xenograft samples from  
303 the same patient (mean Pearson cor = 0.70), suggesting that the SCNA patterns in  
304 these samples were not dramatically altered by clonal selection within the mouse.  
305 Determination of SCNA-based clonal composition and tumor purity was performed using  
306 the HATCHet algorithm<sup>41</sup>, providing additional context for interpretation of results.  
307 HATCHet results show a very high degree of SCNA-based clonal conservation from one  
308 clinical timepoint to the next.

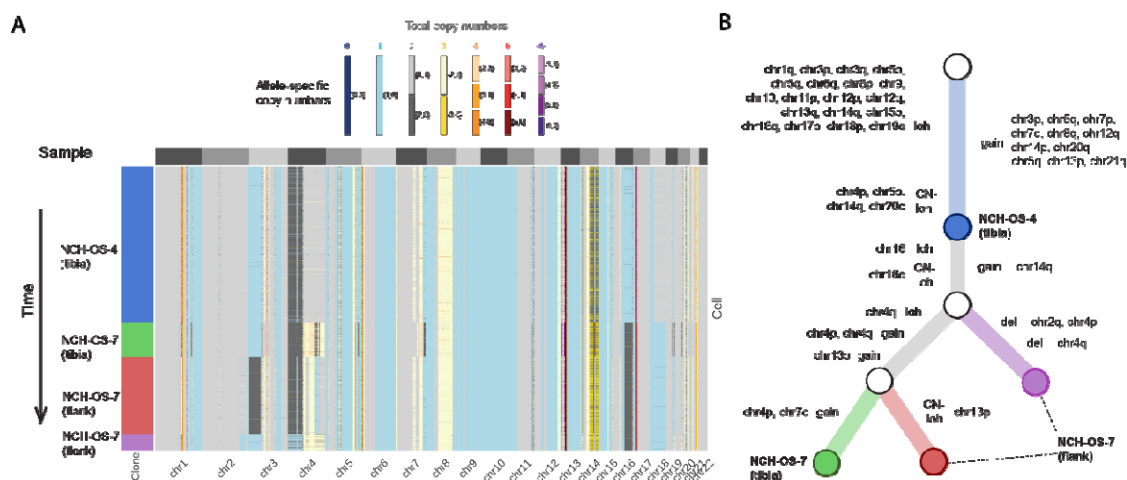

**Figure 3. Phylogenetic reconstruction of tumor evolution is consistent with longitudinal ordering of matched tumor samples and reveals conservation of SCNA profiles.** (A) Allele-specific copy numbers (heatmap colors) across all autosomes (columns) have been inferred by CHISEL jointly across 4238 cells (rows) in 3 tumor samples from the same patient: 1 pre-treatment sample (NCH-OS-4 tibia) and two post-treatment samples (NCH-OS-7 tibia and NCH-OS-7 flank). CHISEL groups cells into 4 distinct clones (blue, green, red, and purple) characterized by different complements of SCNAs. (B) Phylogenetic tree describes the evolution in terms of SCNAs for the four identified tumor clones. The tree is rooted in normal diploid clone (white root) and is characterized by two unobserved ancestors (white internal nodes). Edges are labelled with the corresponding copy-number events that occurred and transformed the copy-number profile of the parent into the profile of the progeny. The four tumor clones (blue, green, red, and purple) are labelled according to the sample in which they were identified.

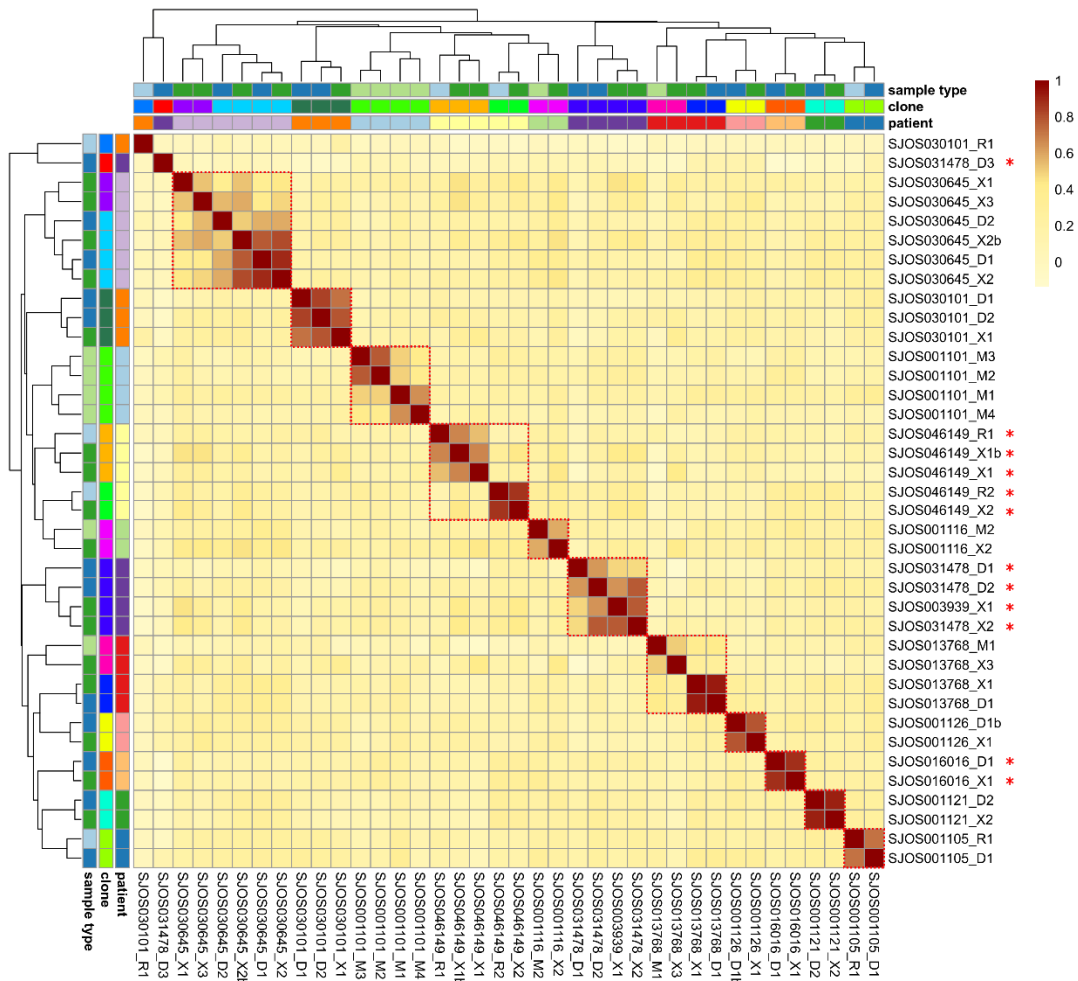

310

311 **Figure 4. CNA correlation between osteosarcoma samples.** Pearson R values denoting  
312 correlation of binned copy numbers between samples. Colors on x and y-axes indicate each  
313 sample's patient of origin and type as well as the clones defined from the correlation analysis.  
314 Red asterisks denote samples from patients with germline TP53 mutations. Note that  
315 SJOS003939\_X1 is from the same patient as SJOS031478\_\* samples.

316

## 317 Discussion

318 Osteosarcoma is one of several malignancies typified by chaotic genomic landscapes  
319 dominated by structural variation and corresponding copy number alterations<sup>3</sup>.

320 Chromosomal complexity in osteosarcoma and other cancers with complex karyotypes

321 has often been assumed to represent underlying genomic instability, suggesting that

322 these tumors gradually accumulate structural changes that lead to increasing

323 complexity, with continual selection of ever more aggressive clones driving malignant



324 progression. This concept was supported by previous reports demonstrating that, in  
325 some patients, spatially separated tumor samples exhibit slightly divergent SNP and  
326 SCNA patterns<sup>42,43</sup>. These studies also noted that, while there is heterogeneity between  
327 samples, there seem to be clones that are shared across multiple metastatic foci. By  
328 nature, these studies understandably focused on identifying SNP and copy number  
329 differences contained within distinct lesions in these highly aggressive tumors, with the  
330 largest sample sets collected at autopsy. By utilizing single cell DNA sequencing, we  
331 have been able to investigate intra-tumor genomic heterogeneity and tumor evolution in  
332 concrete ways that were previously possible only by estimation and inference using bulk  
333 sequencing methods<sup>44-47</sup>. This allowed us to ask different questions related to the  
334 stability of these complex genomes within a tumor sample. We were surprised to find  
335 that cells within a tumor demonstrated surprisingly little cell-to-cell variability in SCNA  
336 profiles - results that, at first, seemed discordant with previous reports of intra-tumoral  
337 genomic heterogeneity in osteosarcoma<sup>19</sup>.

338 Analyzing longitudinal sets of paired samples, we showed that these particular  
339 osteosarcoma tumors maintained relatively stable SCNA profiles from diagnosis to  
340 relapse, primary tumor to metastasis, and during growth in two distinct environments.  
341 Our phylogenetic analysis suggested that the most recent common ancestor of these  
342 related samples harbored almost all of the observed SCNAs, suggesting that most of the  
343 genomic aberrations arose early in the tumorigenic process within these patients,  
344 followed by a long period of stable clonal expansion (clonal stasis)<sup>18</sup>. Our analysis of  
345 bulk whole genome sequence data from St. Jude supports this observation and  
346 highlights an important observation. Where we observed multiple clones in our single  
347 cell data, each clone was homogeneous in its SCNA patterns across cells within the  
348 clone, but highly distinct from other clones (**Figure 1**). We observed the same

349 phenomenon in the bulk St. Jude data where a single clone detected in multiple  
350 temporally or anatomically separated samples had highly conserved SCNAs while  
351 distinct clones were highly divergent (Figure 4). This suggests that each of these clones  
352 either derive from a very early event that produced multiple distinct clones, or  
353 independent tumorigenesis events.

354 An inherent limitation of single cell analysis of biopsy samples is that they are not  
355 representative of the entire tumor and so the homogeneous cell populations we observe  
356 could, in part, derive from the small sample size involved. However, our data include  
357 independent data from multiple biopsies that showed similar clonal patterns. Also, our  
358 analysis of the St. Jude samples includes multiple independent biopsies from patients  
359 and demonstrates the same pattern of SCNA conservation across samplingsingle cell. A  
360 potential unexpected advantage of the small sample size inherent to tumor biopsies is  
361 that these samples tended to be clonal in nature in our single cell data. Given this, it may  
362 be feasible to assume that bulk SCNA results are representative of most cells within the  
363 biopsy.

364 Another limitation of biopsy samples is the potential for normal cell types within the  
365 sample to interfere with the evaluation of SCNAs. If too large of a proportion of normal  
366 cells are present, estimates of copy number will be less accurate. For instance,  
367 Supplemental **Figure S8A** shows sample SJOS031478\_D1 which has very low copy  
368 number alteration values, suggesting that this sample may have a large proportion of  
369 normal cells, making detection of SCNA difficult. Deconvolution can improve, but not  
370 fully overcome, this issue<sup>41</sup>. To help compensate for this issue, for **Figure 4** we used  
371 correlation between samples instead of comparison of absolute copy numbers. This  
372 allows sample SJOS031478\_D1 to cluster closely with SJOS031478\_D2 in **Figure 4**  
373 despite apparent contamination with normal tissue. Samples SJOS031478\_D1 and

374 SJOS031478\_D3 had very low correlation in their SCNA patterns. It is notable that these  
375 samples harbor distinct SCNAs including a deletion of a large portion of chromosome  
376 five in SJOS031478\_D3 that is absent from SJOS031478\_D1 and a large amplification  
377 of chromosome eight present in SJOS031478\_D1 but absent from SJOS031478\_D3  
378 (Supplemental **Figure S8A**) indicating that these are distinct clones. Similar patterns can  
379 be seen in Supplemental **Figure S8J** where SJOS046149\_R2 and SJOS046149\_X2 are  
380 distinct from SJOS046149\_R1, SJOS046149\_X1 and SJOS046149\_X1b.

381 One genomic change that was readily evident within our data was the common  
382 occurrence of WGD. Using the CHISEL algorithm<sup>27</sup>, we identified high levels of  
383 aneuploidy and extensive genomic aberrations that were dominated by deletions within  
384 these osteosarcoma tumors. Consistent with previous reports suggesting WGD as a  
385 mechanism to mitigate the effects of widespread deletions<sup>34</sup>, we identified extensive  
386 deletions even in tumors that had not undergone duplication. Indeed, some of our  
387 samples showed subclones of cells that differed across the genome by almost exactly  
388 two-fold, which may represent populations of cells that had undergone duplication (with  
389 the duplicated fraction being the dominant clone). These findings support the hypothesis  
390 that duplication is a process that produces a more aggressive clone from cells that are  
391 first affected by widespread deletion.

392 To expand the analysis addressing the question of stability beyond our single cell WGS  
393 samples, we evaluated SNCAs in bulk WGS data derived from osteosarcoma samples.  
394 We investigated paired tumor samples across 14 patients (and included the associated  
395 patient-derived xenografts, where available) to determine if SCNA patterns were stable  
396 across time. We observed that there were both identical and divergent clones within  
397 single patients. Clones were similar with correlations as high as 0.92. In the few patients  
398 where relapse specimens contained highly divergent clones (**Supplemental Figure**

399 **S8A-K**), a deeper analysis revealed germline TP53 mutations in many cases (**Figure 4**).  
400 In these patients harboring a genetic predisposition to developing osteosarcoma, it is  
401 likely that these genetically distinct lesions represent independent oncogenic events and  
402 it is possible that TP53 activity was impaired through alternative means in the other  
403 patients.

404 Historically, studies in osteosarcoma (and other cancers) have equated a high level of  
405 SCNA with ongoing genomic instability<sup>31,48</sup>, and some direct evidence has supported this  
406 concept<sup>43</sup>. However, several recent studies seem to challenge this conclusion, showing  
407 preservation of SCNA profiles in primary vs metastatic and diagnostic vs relapse  
408 samples<sup>5,22,42</sup>. Our findings support the hypothesis that mechanisms leading to  
409 widespread structural alterations are active early in tumorigenesis but resolve and are  
410 followed by long periods of relative stability. These seemingly discordant observations  
411 may both be true. First, there may be different paths to chromosomal complexity in  
412 different tumors—processes that resolve in some tumors, but do not in others. Indeed,  
413 nearly all these publications contain sample sets that seem to support higher and lower  
414 levels of chromosomal (in)stability.

415 Second, tumor cells may experience time-limited periods of relative instability, resulting  
416 in the phenomenon of punctuated equilibrium, as has been shown in other cancer  
417 types<sup>18</sup>. In a punctuated equilibrium scenario, the timing of the biopsy would change the  
418 likelihood of finding more or less SCNA heterogeneity within the tumor using methods  
419 like single cell WGS.

420 To synthesize these concepts, there are several potential models for the emergence of  
421 SCNA-defined clones in osteosarcoma (**Figure 5**). A single initiation event giving rise to  
422 a single dominant clone followed by highly stable genomic organization (**Figure 5A**)

423 would cause all tumor samples from a patient to have consistent SCNA patterns in both  
424 bulk and single cell sequencing. This mechanism, however, would not be supported by  
425 previously published data<sup>42,43</sup> or the results presented here.

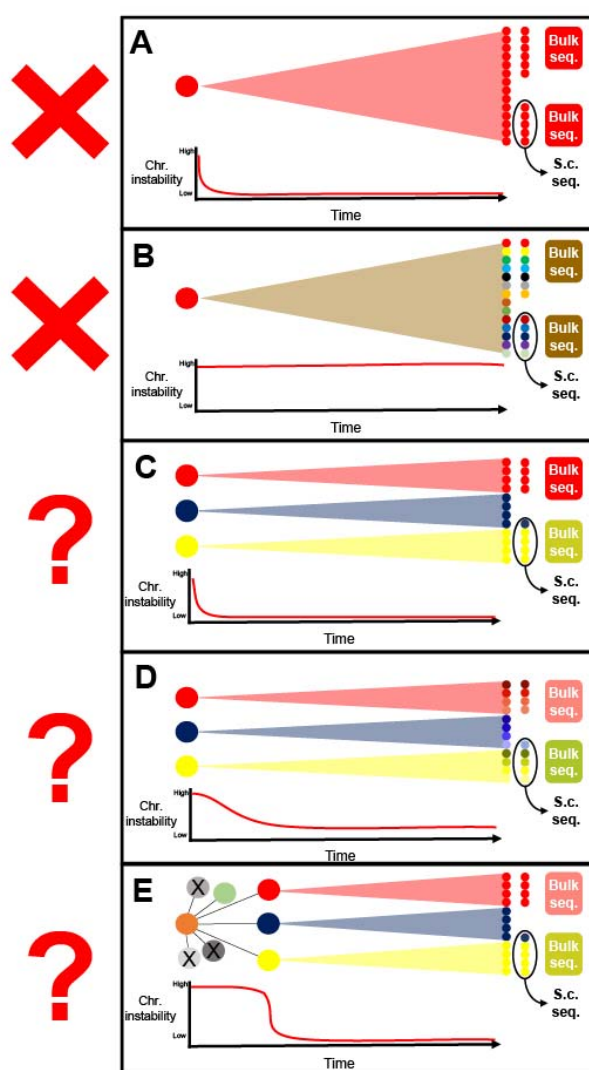

426

427 **Figure 5. Possible models for temporal SCNA stability.** (A) After tumor initiation, if  
428 chromosomal instability is low, tumors will have identical SCNA patterns across all cells.  
429 (B) High tumor instability would result in tumors with highly heterogeneous SCNA patterns  
430 across cells which may not be apparent in bulk sequencing. (C) If there are multiple  
431 initiation events with low subsequent genomic instability SCNA patterns will be  
432 consistent across clones, which will be apparent by both bulk and single cell  
433 sequencing. (D) If there are multiple initiation events with ongoing genomic instability,  
clones derived from each will be similar but with highly variable

434 SCNA patterns within a clone. This heterogeneity would be apparent by single cell sequencing  
435 but not bulk sequencing. (E) If a single initiation event is followed by an initial period of genomic  
436 instability, divergent clones could emerge. Patterns of stability within a clone would suggest that  
437 chromosomal stability is re-established prior to clonal expansion.  
438

439 In an alternative model, instability persists from the oncogenic insult forward (**Figure**  
440 **5B**). This model would produce samples containing multiple divergent subclones, which  
441 would be evident in bulk sequencing collected in different loci, though not detectable  
442 within a single sample. Single cell analyses would identify several SCNA-defined clones  
443 within each sample. This model seems less likely considering our single cell results.

444 A third outcome could result if there were multiple independent initiation events,  
445 producing several competing clones within a tumor, followed by a period of stable  
446 chromosomal organization (**Figure 5C**). This mechanism, which is consistent with the  
447 punctuated equilibrium hypothesis<sup>18</sup>, could produce multiple samples from a patient with  
448 divergent SCNA patterns by bulk sequencing, however, cells within each sample would  
449 demonstrate highly similar copy number patterns (assuming the sample does not  
450 overlap a boundary between clones). This model agrees with both published  
451 observations<sup>42,43</sup> and the results presented here.

452 A slight modification of this model would invoke early mechanisms giving rise to multiple  
453 competing clones, followed by a period where an independent mechanism causes  
454 ongoing low-level chromosomal instability within each founder clone (**Figure 5D**). This  
455 mechanism would generate multiple slightly divergent clones within each sample. We  
456 see some evidence to support this model, such as the similar, but distinct, clones  
457 observed in the NCH-OS-7 samples in Figures 1 and 3. These patterns could also be  
458 explained by tissue sampling bias, experimental variance or computational noise caused  
459 by the low sequencing depth inherent to single cell data. A larger study would be needed  
460 to evaluate this.

461 A final model, which would also be consistent with both our single cell data and the  
462 published record, suggests a single initiation event followed by a period of where  
463 daughter cells exhibit chromosomal instability (**Figure 5E**), creating a diversity of  
464 competing clones. Eventually, clones emerge that exhibit chromosomal stability and  
465 have a competitive advantage. In this scenario, tumor cells within a patient are distinct  
466 from clone to clone, but homogeneous within a clone, with a small subset of shared  
467 SCNAs that were present in the origin cell and maintained through the subsequent  
468 chromosomal instability.

469 While copy number patterns might be stable after an initial structure-altering event,  
470 SNVs arise through completely different mechanisms and likely have different  
471 evolutionary dynamics. Previous studies looking at osteosarcoma across therapeutic  
472 time show clear sequence related changes dominated by patterns that suggest a  
473 cisplatin induced mutational burden<sup>43</sup>. However, the structural integrity of the  
474 chromosomes does not seem to be affected by treatment<sup>42,43</sup>.

475 A brief (single cycle) expansion of tissue using an animal host proved useful for  
476 generating high-quality single cell suspensions of sufficient quantity while maintaining  
477 high fidelity to the original patient sample. This approach is not intended to model tumor  
478 progression in a murine host, but rather to maximize the data obtained from each of  
479 these incredibly valuable samples. Some have expressed concerns that mouse-specific  
480 evolution selects for sub clonal populations<sup>49</sup>. However, the mouse-specific evolution  
481 that occurs over many passages (such as in the development of a PDX) does not occur  
482 when the mouse is used as a vehicle for brief expansion<sup>30</sup>. Our SCNA analysis  
483 comparing results of these expanded tissues to bulk sequencing performed directly on  
484 the patient samples showed a very high correlation between expanded and primary

485 samples. Therefore, this approach may represent a productive compromise enabling  
486 multiple lines of research on tissues with limited availability in rare diseases.

487 Our findings of clonal stasis in osteosarcoma sheds some light on the complex  
488 evolutionary history of this cancer type and could have important implications for tumor  
489 evolution, patient diagnosis and treatment of osteosarcoma. However, a much larger  
490 sample size of patient tissues is needed to capture the full heterogeneity of  
491 osteosarcoma seen in the human disease and describe the prevalence of multiple tumor  
492 sub-clones. Somewhat ironically, one may conclude from this data that bulk sequencing  
493 methods likely produce an adequate assessment of SCNA profiles and heterogeneity in  
494 osteosarcoma, given the lack of heterogeneity found in our analysis. These data likewise  
495 suggest that, in a clinical setting, sequencing analyses based on SCNA likely remain  
496 valid, even into treatment and relapse, assuming separate samples derive from the  
497 same clonal tumor population.

498 At a biological level, these results support the early catastrophe model as a primary  
499 mechanism of osteosarcoma complexity, suggesting that most structural  
500 rearrangements occur early in the tumorigenic process. While other rearrangements  
501 certainly can occur during malignant progression, subsequent structural events do not  
502 appear to be *necessary* for invasion, metastasis, or therapeutic resistance (though they  
503 certainly may *contribute* to such processes), nor do they appear to be the same  
504 mechanisms that create widespread structural complexity. Ongoing research will  
505 continue to inform our understanding of the contributions that initial catastrophic events  
506 and ongoing mechanisms of genomic evolution have and how they influence clinical  
507 outcomes.



508 It is important to note that our study is performed in a way that is generally insensitive to  
509 other alterations (such as SNVs) as a source of genomic variation, though few recurrent  
510 mutations have been identified in osteosarcoma, despite extensive genetic analysis<sup>5,48,50</sup>.  
511 If both observations hold true, one must conclude that the acquisition of traits that drive  
512 malignant progression arise through epigenetic-based evolutionary processes, which  
513 remain poorly understood. Interestingly, we and others have shown that these same  
514 osteosarcomas demonstrate a high level of intra-tumor transcriptional heterogeneity<sup>19,51</sup>.  
515 This heterogeneity of gene expression in cells that are genomically homogeneous  
516 suggests that there may be microenvironmental differences or an underlying epigenetic  
517 heterogeneity, which could be a basis for competition and selection of tumor cells.

## 518 **Materials and Methods**

### 519 **Experimental model – Expanded patient tissues and murine studies**

520 *Expanded patient tissue.* Patient samples NCH-OS-4, NCH-OS-7, NCH-OS-8, NCH-OS-  
521 10 and NCH-OS-11 were obtained from patients consented under an Institutional  
522 Review Board (IRB)-approved protocol IRB11-00478 at Nationwide Children's Hospital  
523 (Human Subject Assurance Number 00002860). Germline whole genome sequencing  
524 (WGS) was generated from patient blood collected under IRB approved protocol IRB11-  
525 00478. Patient samples SJOS046149\_X1, SJOS046149\_X2, SJOS003939\_X1 and  
526 SJOS031478\_X2, with matched normal WGS were received from St. Jude's Children's  
527 Research Hospital through the Childhood Solid Tumor Network<sup>38-40</sup>. The OS-17 PDX  
528 was established from tissue obtained in a primary femur biopsy performed at St. Jude's  
529 Children's Research Hospital in Memphis and was a gift from Peter Houghton<sup>29</sup>.

530 *Murine Studies. Flank tumors.* Viable tissue fragments from patient tissue were  
531 expanded in C.B-17/lcrHsd-Prkdc<sup>scid</sup> mice as subcutaneous tumors following approved

532 IACUC protocols. These tumors were allowed to grow to 300-600 mm<sup>3</sup> before harvest.  
533 Passage 1 expanded tissue was used for all samples, with the exception of OS-17 (p18).  
534 *Orthotopic primary tumors*. Single cell suspensions of 5x10<sup>5</sup> cells were injected intra-  
535 tibially in C.B-17/lcrHsd-Prkdc<sup>scid</sup> mice as per IACUC guidelines. These tumors were  
536 harvested once they grew to 800 mm<sup>3</sup> and prepped for single cell DNA-seq.

### 537 **Single cell suspension and DNA library generation**

538 Tumors harvested from mice were processed using the human tumor dissociation kit  
539 (Miltenyi Biotec, 130-095-929) with a GentleMacs Octo Dissociator with Heaters  
540 (Miltenyi Biotec, 130-096-427). Single cell suspensions in 0.04% BSA-PBS of  
541 dissociated tumor tissues were generated and frozen down using the 10X freezing  
542 protocol for SCNA. The frozen down single cell suspensions were processed using the  
543 Chromium Single Cell DNA Library & Gel Bead Kit (10X genomics #1000040) according  
544 to the manufacturer's protocol with a target capture of 1000-2000 cells. These barcoded  
545 single cell DNA libraries were sequenced using the NovaSeq 6000 System using paired  
546 sequencing with a 100bp (R1), 8bp (i7) and 100bp (R2) configuration and a sequencing  
547 coverage ranging from 0.01X to 0.05X (~0.02X on average) per cell. Germline WGS was  
548 performed on NovaSeq SP 2x150BP.

### 549 **Single cell SCNA calling using CHISEL**

550 Paired-end reads were processed using the Cell Ranger DNA Pipeline (10X Genomics),  
551 obtaining a barcoded BAM file for every considered single cell sequencing dataset. As  
552 described previously<sup>27</sup>, the pipeline consists of barcode processing and sequencing-  
553 reads alignment to a reference genome, for which we used hg19. We applied CHISEL  
554 (v1.0.0) to analyze each generated barcoded BAM file using the default parameters and  
555 by increasing to 0.12 the expected error rate for clone identification in order to account

556 for the lower sequencing coverage of the analyzed data<sup>27</sup>. In addition, we provided  
557 CHISEL with the available matched-normal germline sample from each patient and  
558 phased germline SNPs according to the recommended pipeline by using Eagle2 through  
559 the Michigan Imputation Server with the Haplotype Reference Consortium (HRC)  
560 reference panel (v.r1.1 2016). CHISEL inferred allele- and haplotype-specific copy  
561 numbers per cell and used these results to group cells into distinct tumor clones, while  
562 excluding outliers and likely noisy cells. To determine fraction of aberrant genome  
563 (genome affected by SCNAs), we defined aberrant as any non-diploid genomic region  
564 (i.e., allele-specific copy numbers different than {1, 1}) in tumors not affected by WGDs  
565 (NCH-OS-10, NCH-OS-4, and NCH-OS-7) or any non-tetraploid genomic region (i.e.,  
566 allele-specific copy numbers different than {2, 2}) in tumors affected by WGDs (NCH-  
567 OS-8, OS-17, NCH-OS-11, SJOS046149\_X2, SJOS003939\_X2 and SJOS003939\_X1).  
568 We defined deletions as previously described in cancer evolutionary studies<sup>26,52-54</sup>. We  
569 say that a genomic region in a cell is affected by a deletion when any of the two allele-  
570 specific copy numbers inferred by CHISEL is lower than the expected allele-specific  
571 copy number (1 for non-WGD tumors or 2 for tumors affected by WGD). Conversely, a  
572 genomic region is amplified when any of the two allele-specific copy numbers is higher  
573 than expected.

#### 574 **Reconstruction of copy-number trees**

575 We reconstructed copy-number trees for tumor samples NCH-OS-4 (tibia), NCH-OS-7  
576 (flank) and NCH-OS-7 (tibia), to describe the phylogenetic relationships between distinct  
577 tumor clones inferred by CHISEL based on SCNAs using the same procedure proposed  
578 in previous studies<sup>27</sup>. Briefly, we reconstructed the trees using the maximum parsimony  
579 model of interval events for SCNAs<sup>52,53</sup> and the copy-number profiles of each inferred  
580 clone. These copy number profiles were obtained as the consensus across the inferred

581 haplotype-specific copy numbers derived by CHISEL for all the cells in the same clone,  
582 where we also considered the occurrence of WGDs predicted by CHISEL. We classified  
583 copy-number events as deletions (i.e., del), as LOH which are deletions resulting in the  
584 complete loss of all copies of one allele (loh), as copy-neutral LOH which are LOHs in  
585 which the retained allele is simultaneously amplified, and as gains (gain).

#### 586 **SCNA calling on whole genome data**

587 To compare SCNA patterns across multiple tumor samples from the same patients, we  
588 downloaded a total of 47 whole genome sequence datasets from St. Jude's DNAnexus  
589 from 14 patients including germline data and multiple tumor samples (diagnosis, relapse,  
590 metastasis and xenograft). We also included the seven scSCNA datasets we generated  
591 which had matched germline whole genome data in the St. Jude data and treated these  
592 as bulk sequencing data for this analysis. We used samtools<sup>55</sup> to convert the bam files to  
593 fastq and aligned all datasets to a joint hg38/mm10 reference. We filtered out all mouse  
594 sequences and removed PCR duplicates. We then called SCNAs with VarScan<sup>56</sup>. Next,  
595 we combined all SCNA data by calculating the median copy number for 1,000 bp non-  
596 overlapping bins. Correlation between samples was calculated using the cor function in  
597 R and the resulting output was plotted as a heatmap using the pheatmap R package  
598 (<https://github.com/raivokolde/pheatmap>).

#### 599 **SNP calling on whole genome data**

600 To assess genetic heterogeneity of all samples, we produced phylogenetic trees from  
601 SNP data. We used the bam alignment files produced during the SCNA calling analysis  
602 and called SNPs using bcftools' mpileup function<sup>55</sup>. We removed SNP calls with a quality  
603 below 20 and read depth below 20, and then generated vcf files using bcftools<sup>55</sup>. To

604 check TP53 status we merged the SNP calls with known SNPs from ClinVar<sup>57</sup> and kept  
605 SNPs with a clinical significance (CLNSIG) of “Pathogenic”<sup>58</sup>.

## 606 **Data and code availability**

607 All the processed data, scripts and results from CHISEL are available on GitHub at  
608 <https://github.com/kidcancerlab/sc-OsteoCNAs>. Whole genome sequencing data for  
609 pediatric relapse tumor samples used for analysis in this study were obtained from St.  
610 Jude Cloud<sup>38–40</sup>.

## 611 **Acknowledgments**

612 We thank our funding sources. This work was generously supported by NIH/NCI  
613 K08CA201638 (R.D.R.), R01CA260178 (R.D.R.) and U24CA248453 (B.J.R.), St.  
614 Baldrick's Foundation Scholar Award (R.D.R.), Hyundai Hope on Wheels Young  
615 Investigator Award (R.D.R.), Cancer Free Kids Foundation (R.D.R.), Steps for Sarcoma  
616 Foundation (R.D.R.), Sarcoma Foundation of America (R.D.R.), a Pelotonia Fellowship  
617 (S.R.), a Nationwide Children's Director's Strategic Development Fund, and an NIH  
618 CTSA Grant UL1TR002733. S.Z. is a Cancer Research UK Career Development Fellow  
619 (Award Reference RCCCDF-Nov21\100005) and is also supported by Rosetrees Trust  
620 (Grant Reference M917) and by a Cancer Research UK UCL Centre Non-Clinical  
621 Training Award (CANTAC721\100022).

## 622 **References**

- 623 1. Casali, P. G. *et al.* Bone sarcomas: ESMO-PaedCan-EURACAN Clinical Practice  
624 Guidelines for diagnosis, treatment and follow-up. *Annals of Oncology* **29**, iv79–  
625 iv95 (2018).
- 626 2. Bridge, J. A. *et al.* Cytogenetic findings in 73 osteosarcoma specimens and a  
627 review of the literature. *Cancer Genet Cytogenet* **95**, 74–87 (1997).
- 628 3. Chen, X. *et al.* Recurrent somatic structural variations contribute to tumorigenesis  
629 in pediatric osteosarcoma. *Cell Rep* **7**, 104–112 (2014).

- 630 4. Squire, J. A. *et al.* High-resolution mapping of amplifications and deletions in  
631 pediatric osteosarcoma by use of CGH analysis of cDNA microarrays. *Genes*  
632 *Chromosomes Cancer* **38**, 215–225 (2003).
- 633 5. Sayles, L. C. *et al.* Genome-informed targeted therapy for osteosarcoma. *Cancer*  
634 *Discov* **9**, 46–63 (2019).
- 635 6. Stephens, P. J. *et al.* Massive genomic rearrangement acquired in a single  
636 catastrophic event during cancer development. *Cell* **144**, 27–40 (2011).
- 637 7. Meyerson, M. & Pellman, D. Cancer genomes evolve by pulverizing single  
638 chromosomes. *Cell* vol. 144 9–10 Preprint at  
639 <https://doi.org/10.1016/j.cell.2010.12.025> (2011).
- 640 8. Li, Y. *et al.* Constitutional and somatic rearrangement of chromosome 21 in acute  
641 lymphoblastic leukaemia. *Nature* **508**, 98–102 (2014).
- 642 9. Behjati, S. *et al.* Recurrent mutation of IGF signalling genes and distinct patterns  
643 of genomic rearrangement in osteosarcoma. *Nat Commun* **8**, 1–8 (2017).
- 644 10. Perry, J. A. *et al.* Complementary genomic approaches highlight the PI3K/mTOR  
645 pathway as a common vulnerability in osteosarcoma. *Proc Natl Acad Sci U S A*  
646 **111**, E5564–E5573 (2014).
- 647 11. Zhao, Y. *et al.* Single-cell RNA sequencing reveals the impact of chromosomal  
648 instability on glioblastoma cancer stem cells. *BMC Med Genomics* **12**, 79 (2019).
- 649 12. Bakker, B. *et al.* Single-cell sequencing reveals karyotype heterogeneity in murine  
650 and human malignancies. (2016) doi:10.1186/s13059-016-0971-7.
- 651 13. Watkins, T. B. K. *et al.* Pervasive chromosomal instability and karyotype order in  
652 tumour evolution. *Nature* **587**, 126–132 (2020).
- 653 14. Bach, D. H., Zhang, W. & Sood, A. K. Chromosomal instability in tumor initiation  
654 and development. *Cancer Research* vol. 79 3995–4002 Preprint at  
655 <https://doi.org/10.1158/0008-5472.CAN-18-3235> (2019).
- 656 15. Fearon, E. R. & Vogelstein, B. A genetic model for colorectal tumorigenesis. *Cell*  
657 **61**, 759–767 (1990).
- 658 16. Hoglund, M. *et al.* Multivariate analyses of genomic imbalances in solid tumors  
659 reveal distinct and converging pathways of karyotypic evolution. *Genes*  
660 *Chromosomes Cancer* **31**, 156–171 (2001).
- 661 17. Umbreit, N. T. *et al.* Mechanisms generating cancer genome complexity from a  
662 single cell division error. *Science (1979)* **368**, (2020).
- 663 18. Gao, R. *et al.* Punctuated copy number evolution and clonal stasis in triple-  
664 negative breast cancer. *Nat Genet* **48**, 1119–1130 (2016).
- 665 19. Zhou, Y. *et al.* Single-cell RNA landscape of intratumoral heterogeneity and  
666 immunosuppressive microenvironment in advanced osteosarcoma. *Nat Commun*  
667 **11**, 1–17 (2020).

- 668 20. Liu, Y. *et al.* Single-Cell Transcriptomics Reveals the Complexity of the Tumor  
669 Microenvironment of Treatment-Naive Osteosarcoma. *Front Oncol* **0**, 2818  
670 (2021).
- 671 21. Xu, H. *et al.* Genetic and clonal dissection of osteosarcoma progression and lung  
672 metastasis. *Int J Cancer* **143**, 1134–1142 (2018).
- 673 22. Negri, G. L. *et al.* Integrative genomic analysis of matched primary and metastatic  
674 pediatric osteosarcoma. *J Pathol* **249**, 319–331 (2019).
- 675 23. Wang, Y. & Navin, N. E. Advances and Applications of Single Cell Sequencing  
676 Technologies. *Mol Cell* **58**, 598 (2015).
- 677 24. Laks, E. *et al.* Clonal Decomposition and DNA Replication States Defined by  
678 Scaled Single-Cell Genome Sequencing. *Cell* **179**, 1207-1221.e22 (2019).
- 679 25. Tarabichi, M. *et al.* A practical guide to cancer subclonal reconstruction from DNA  
680 sequencing. *Nature Methods* **2021 18:2 18**, 144–155 (2021).
- 681 26. Zaccaria, S. & Raphael, B. J. Accurate quantification of copy-number aberrations  
682 and whole-genome duplications in multi-sample tumor sequencing data. *Nature*  
683 *Communications* **2020 11:1 11**, 1–13 (2020).
- 684 27. Zaccaria, S. & Raphael, B. J. Characterizing allele- and haplotype-specific copy  
685 numbers in single cells with CHISEL. *Nat Biotechnol* (2020) doi:10.1038/s41587-  
686 020-0661-6.
- 687 28. Andor, N. *et al.* Joint single cell DNA-seq and RNA-seq of gastric cancer cell lines  
688 reveals rules of in vitro evolution. *NAR Genom Bioinform* **2**, (2020).
- 689 29. Houghton, P. J. *et al.* The pediatric preclinical testing program: Description of  
690 models and early testing results. *Pediatr Blood Cancer* (2007)  
691 doi:10.1002/pbc.21078.
- 692 30. Woo, X. Y. *et al.* Conservation of copy number profiles during engraftment and  
693 passaging of patient-derived cancer xenografts. *Nature Genetics* **2021 53:1 53**,  
694 86–99 (2021).
- 695 31. Martin, J. W., Squire, J. A. & Zielenska, M. The genetics of osteosarcoma.  
696 *Sarcoma* **2012**, 11 (2012).
- 697 32. Minussi, D. C. *et al.* Breast tumours maintain a reservoir of subclonal diversity  
698 during expansion. *Nature* **592**, 302–308 (2021).
- 699 33. Zack, T. I. *et al.* Pan-cancer patterns of somatic copy number alteration. *Nat*  
700 *Genet* **45**, 1134–1140 (2013).
- 701 34. López, S. *et al.* Interplay between whole-genome doubling and the accumulation  
702 of deleterious alterations in cancer evolution. *Nat Genet* **52**, 283–293 (2020).
- 703 35. Bielski, C. M. *et al.* Genome doubling shapes the evolution and prognosis of  
704 advanced cancers. *Nat Genet* **50**, 1189–1195 (2018).

- 705 36. Passerini, V. *et al.* The presence of extra chromosomes leads to genomic  
706 instability. *Nat Commun* **7**, 1–12 (2016).
- 707 37. Sheltzer, J. M. A transcriptional and metabolic signature of primary aneuploidy is  
708 present in chromosomally unstable cancer cells and informs clinical prognosis.  
709 *Cancer Res* **73**, 6401–6412 (2013).
- 710 38. McLeod, C. *et al.* St. Jude Cloud: A Pediatric Cancer Genomic Data-Sharing  
711 Ecosystem. *Cancer Discov* **11**, 1082–1099 (2021).
- 712 39. Downing, J. R. *et al.* The Pediatric Cancer Genome Project. *Nat Genet* **44**, 619–  
713 622 (2012).
- 714 40. Stewart, E. *et al.* Orthotopic patient-derived xenografts of paediatric solid tumours.  
715 *Nature* **549**, 96–100 (2017).
- 716 41. Zaccaria, S. & Raphael, B. J. Accurate quantification of copy-number aberrations  
717 and whole-genome duplications in multi-sample tumor sequencing data. *Nature*  
718 *Communications* **2020 11:1 11**, 1–13 (2020).
- 719 42. Wang, D. *et al.* Multiregion sequencing reveals the genetic heterogeneity and  
720 evolutionary history of osteosarcoma and matched pulmonary metastases.  
721 *Cancer Res* **79**, 7–20 (2019).
- 722 43. Brady, S. W. *et al.* The Clonal Evolution of Metastatic Osteosarcoma as Shaped  
723 by Cisplatin Treatment. *Mol Cancer Res* **17**, 895–906 (2019).
- 724 44. Navin, N. *et al.* Tumour evolution inferred by single-cell sequencing. *Nature* **472**,  
725 90–95 (2011).
- 726 45. Wang, Y. *et al.* Clonal evolution in breast cancer revealed by single nucleus  
727 genome sequencing. *Nature* **512**, 155–160 (2014).
- 728 46. Navin, N. E. The first five years of single-cell cancer genomics and beyond.  
729 *Genome Research* vol. 25 1499–1507 Preprint at  
730 <https://doi.org/10.1101/gr.191098.115> (2015).
- 731 47. Gawad, C., Koh, W. & Quake, S. R. Single-cell genome sequencing: current state  
732 of the science. *Nature Reviews Genetics* **2016 17:3 17**, 175–188 (2016).
- 733 48. Gröbner, S. N. *et al.* The landscape of genomic alterations across childhood  
734 cancers. *Nature* **555**, 321–327 (2018).
- 735 49. Ben-David, U. *et al.* Patient-derived xenografts undergo mouse-specific tumor  
736 evolution. *Nature Genetics* **2017 49:11 49**, 1567–1575 (2017).
- 737 50. Ma, X. *et al.* Pan-cancer genome and transcriptome analyses of 1,699 paediatric  
738 leukaemias and solid tumours. *Nature* **555**, 371–376 (2018).
- 739 51. Rajan, S. *et al.* Osteosarcoma tumors maintain intratumoral heterogeneity, even  
740 while adapting to environmental pressures that drive clonal selection. *bioRxiv*  
741 **2020.11.03.367342** Preprint at <https://doi.org/10.1101/2020.11.03.367342> (2020).



- 742 52. Schwarz, R. F. *et al.* Phylogenetic Quantification of Intra-tumour Heterogeneity.  
743 *PLoS Comput Biol* **10**, e1003535 (2014).
- 744 53. El-Kebir, M. *et al.* Complexity and algorithms for copy-number evolution problems.  
745 *Algorithms for Molecular Biology 2017 12:1* **12**, 1–11 (2017).
- 746 54. ZaccariaSimone, El-KebirMohammed, W., K. & J., R. Phylogenetic Copy-Number  
747 Factorization of Multiple Tumor Samples. <https://home.liebertpub.com/cmb> **25**,  
748 689–708 (2018).
- 749 55. Danecek, P. *et al.* Twelve years of SAMtools and BCFtools. *Gigascience* **10**, 1–4  
750 (2021).
- 751 56. Koboldt, D. C. *et al.* VarScan 2: Somatic mutation and copy number alteration  
752 discovery in cancer by exome sequencing. *Genome Res* **22**, 568–576 (2012).
- 753 57. Landrum, M. J. *et al.* ClinVar: improving access to variant interpretations and  
754 supporting evidence. *Nucleic Acids Res* **46**, D1062–D1067 (2018).
- 755 58. Tamura, K., Stecher, G. & Kumar, S. MEGA11: Molecular Evolutionary Genetics  
756 Analysis Version 11. *Mol Biol Evol* **38**, 3022–3027 (2021).
- 757

## Figure 1

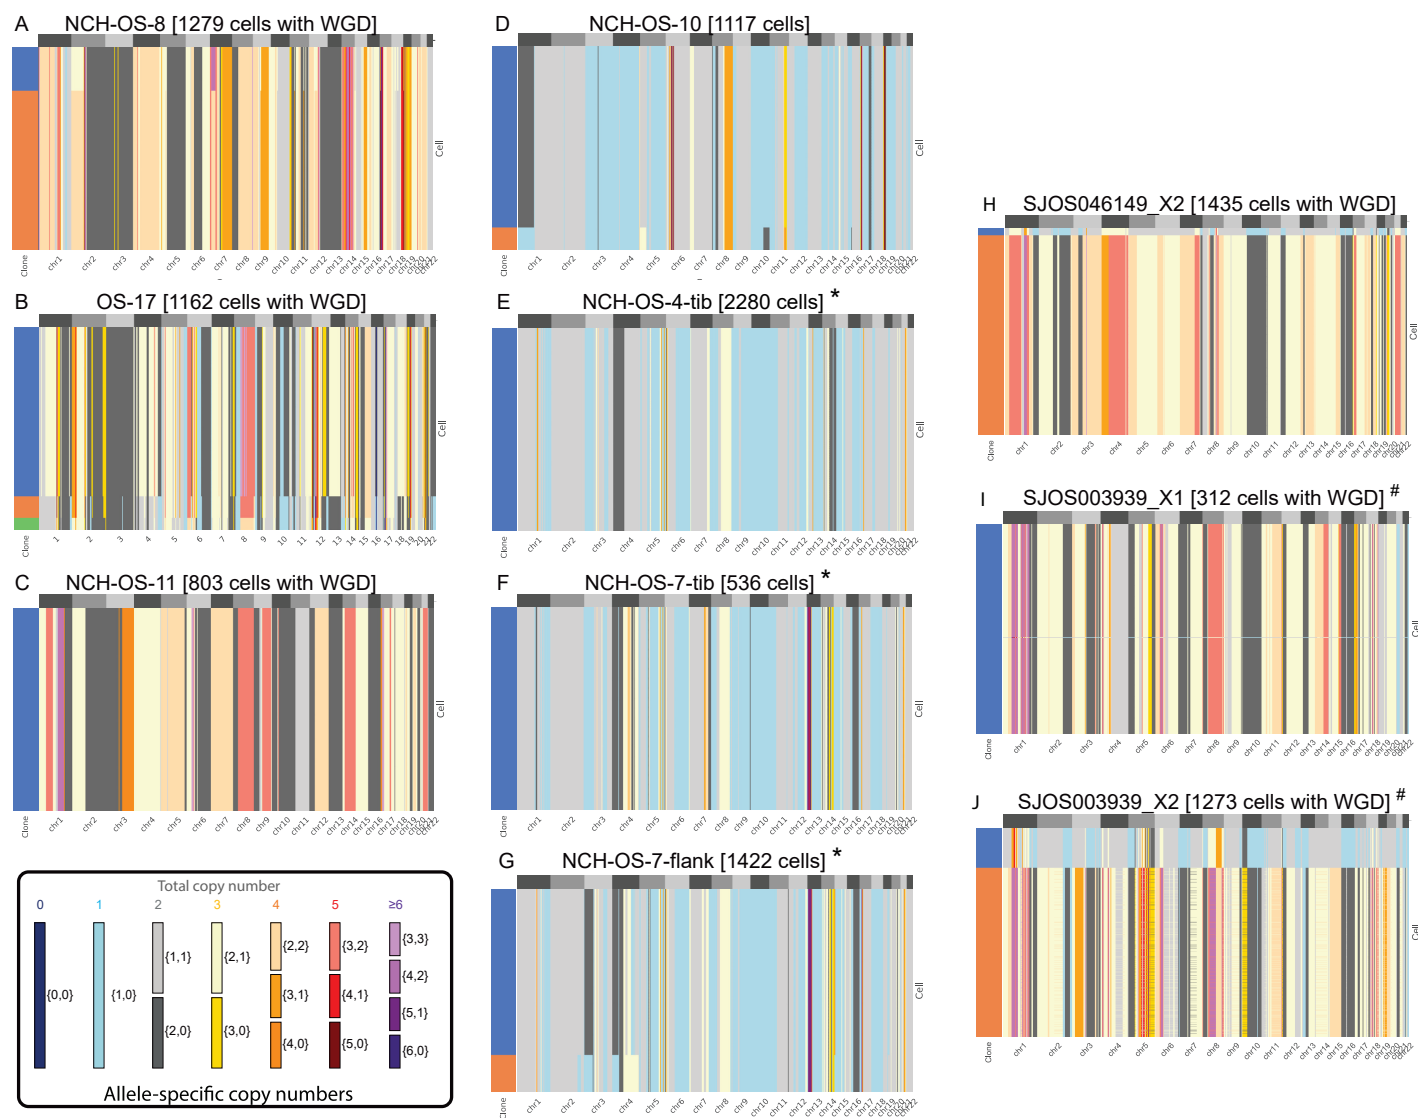

**Figure 1. Extensive genomic complexity in ten expanded osteosarcoma patient tissue samples using single cell DNA sequencing.** Allele-specific copy numbers (heatmap colors) are inferred by using the CHISEL algorithm<sup>27</sup> from each of ten datasets including 300-2300 single cancer cells from osteosarcoma tumors. In each dataset, cancer cells are grouped into clones (colors in leftmost column) by CHISEL based on the inferred allele-specific copy numbers. Corrected allele-specific copy-numbers are correspondingly obtained by consensus. Note that cells classified as noisy by CHISEL have been excluded. “\*” and “#” represent samples obtained from the same patient.

## Figure 2

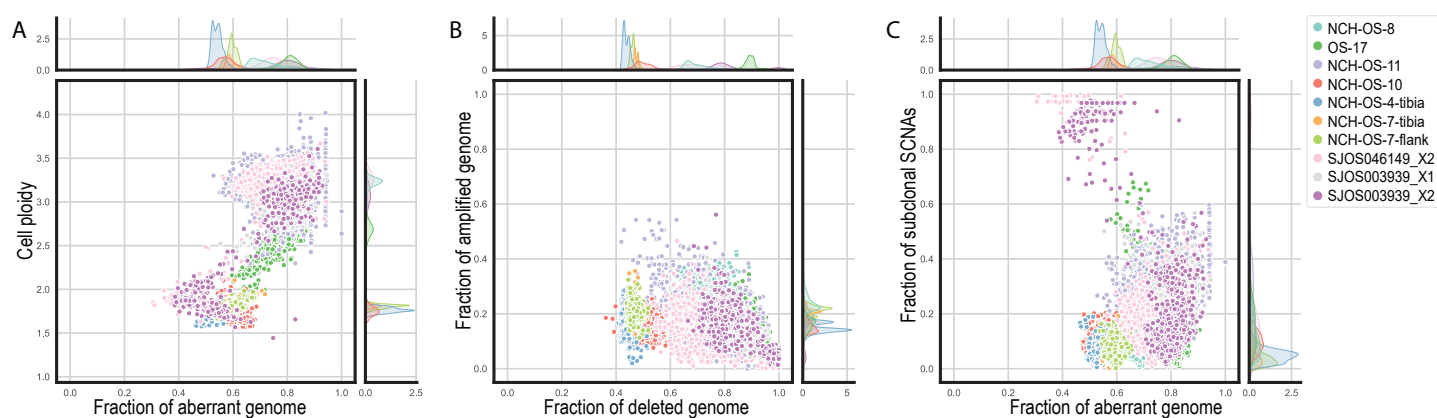

**Figure 2. Osteosarcoma cancer cells exhibit extensive genetic alterations, especially deletions, but a relatively low level of heterogeneity.** (A) Ploidy (y-axis) and fraction of aberrant genome (x-axis) of every cell (point) across the ten analyzed datasets (colors). The kernel density of the marginal distributions of each value is reported accordingly in every plot. (B) Fraction of genome affected by deletions (x-axis) vs. fraction of genome affected by amplifications (y-axis) of every cell (point) across the ten analyzed datasets (colors). (C) Fraction of aberrant genome (x-axis) and fraction of sub-clonal SCNAs (i.e. fraction of the genome with SCNAs different than the most common clone for the same region across all cells in the same dataset, y-axis) of every cell (point) across the ten analyzed datasets (colors).

### Figure 3

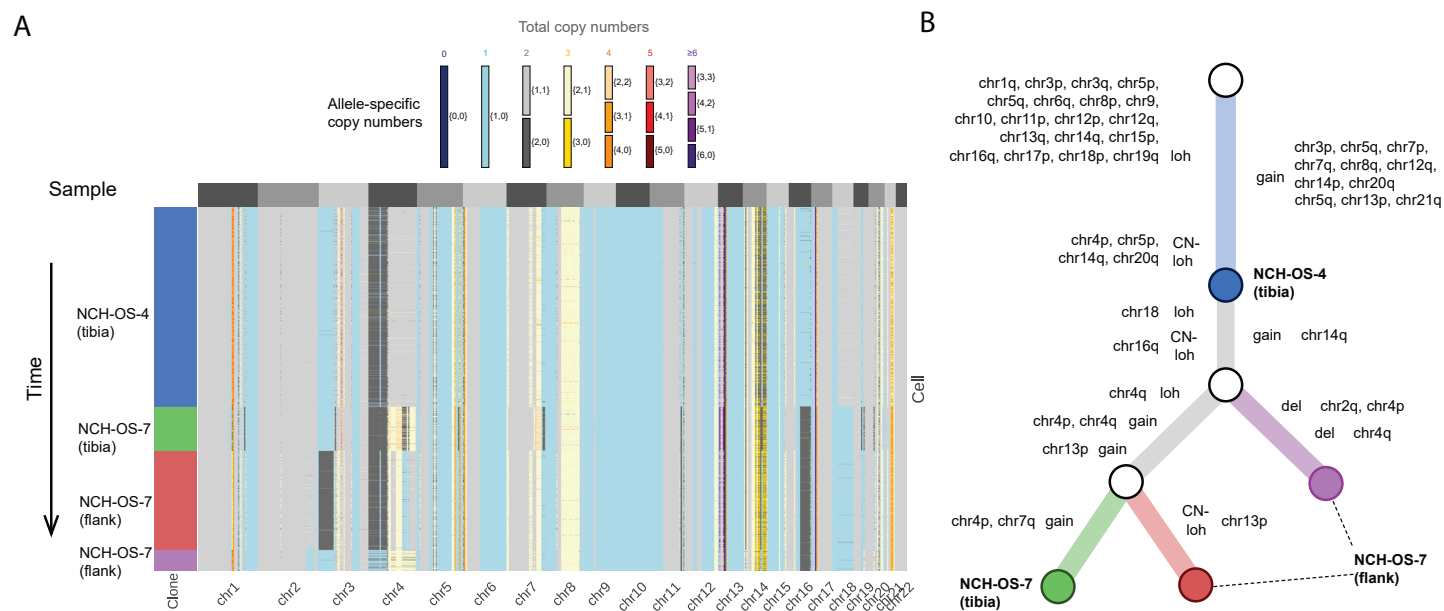

**Figure 3. Phylogenetic reconstruction of tumor evolution is consistent with longitudinal ordering of matched tumor samples and reveals conservation of SCNA profiles.** (A) Allele-specific copy numbers (heatmap colors) across all autosomes (columns) have been inferred by CHISEL jointly across 4238 cells (rows) in 3 tumor samples from the same patient: 1 pre-treatment sample (NCH-OS-4 tibia) and two post-treatment samples (NCH-OS-7 tibia and NCH-OS-7 flank). CHISEL groups cells into 4 distinct clones (blue, green, red, and purple) characterized by different complements of SCNAs. (B) Phylogenetic tree describes the evolution in terms of SCNAs for the four identified tumor clones. The tree is rooted in normal diploid clone (white root) and is characterized by two unobserved ancestors (white internal nodes). Edges are labelled with the corresponding copy-number events that occurred and transformed the copy-number profile of the parent into the profile of the progeny. The four tumor clones (blue, green, red, and purple) are labelled according to the sample in which they were identified.

Figure 4

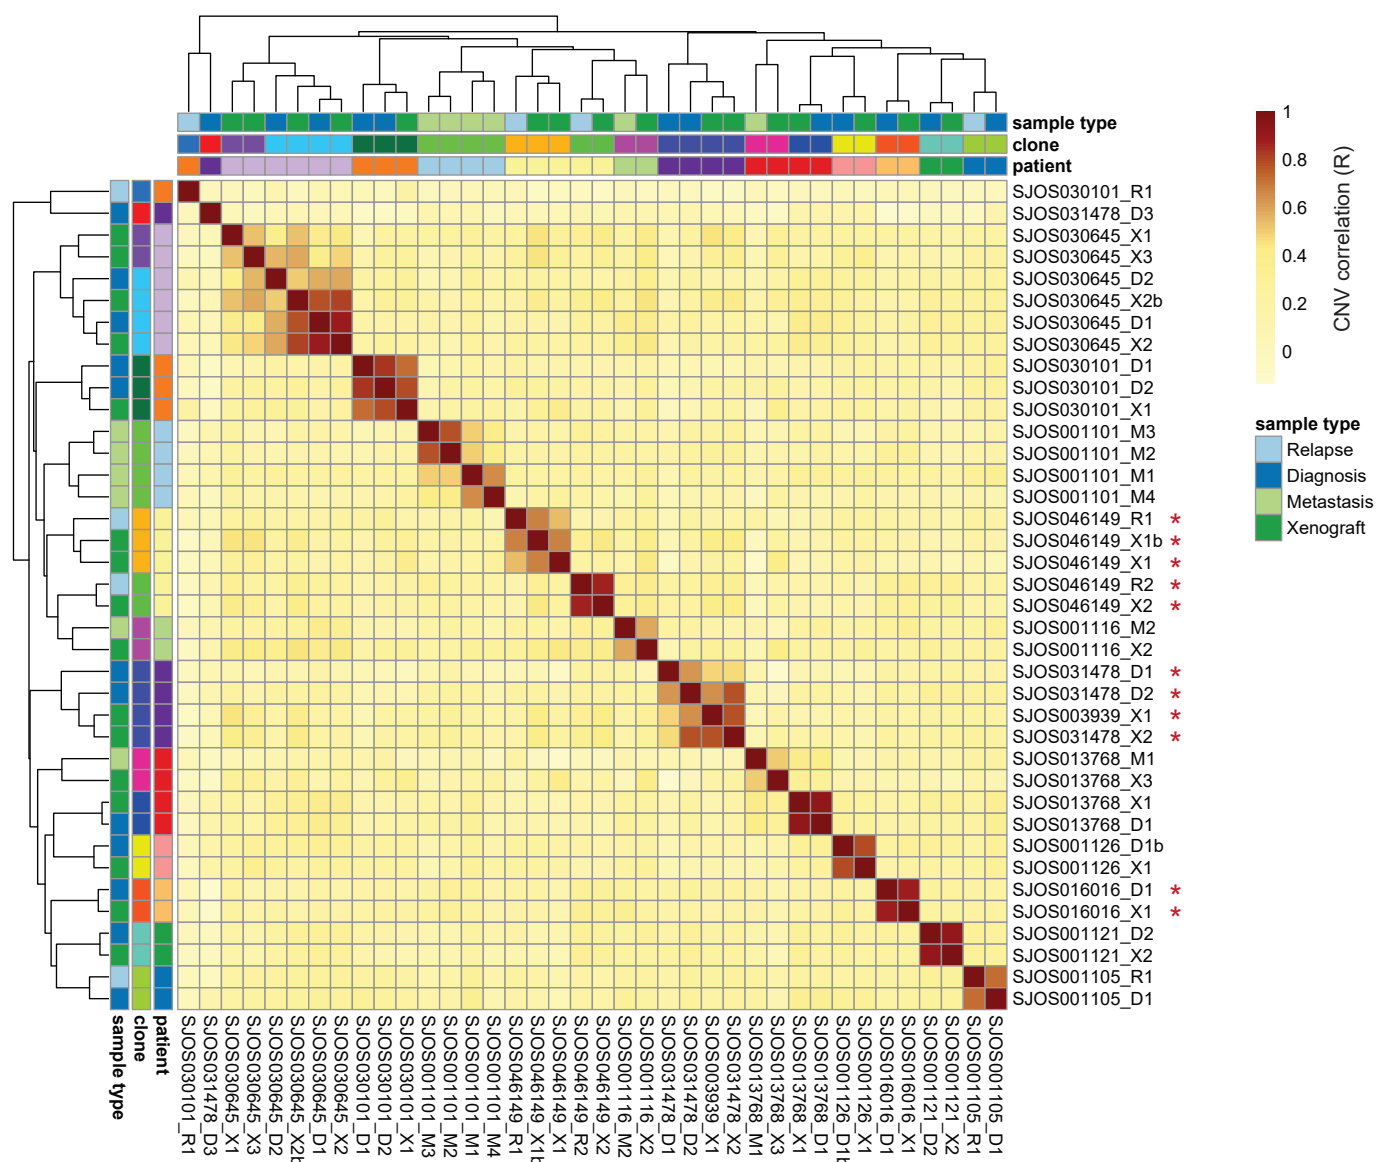

**Figure 4. CNA correlation between osteosarcoma samples.** Pearson R values denoting correlation of binned copy numbers between samples. Colors on x and y-axes indicate each sample's patient of origin and type as well as the clones defined from the correlation analysis. Red asterisks denote samples from patients with germline TP53 mutations. Note that SJOS003939\_X1 is from the same patient as SJOS031478\_\* samples.

## Figure 5

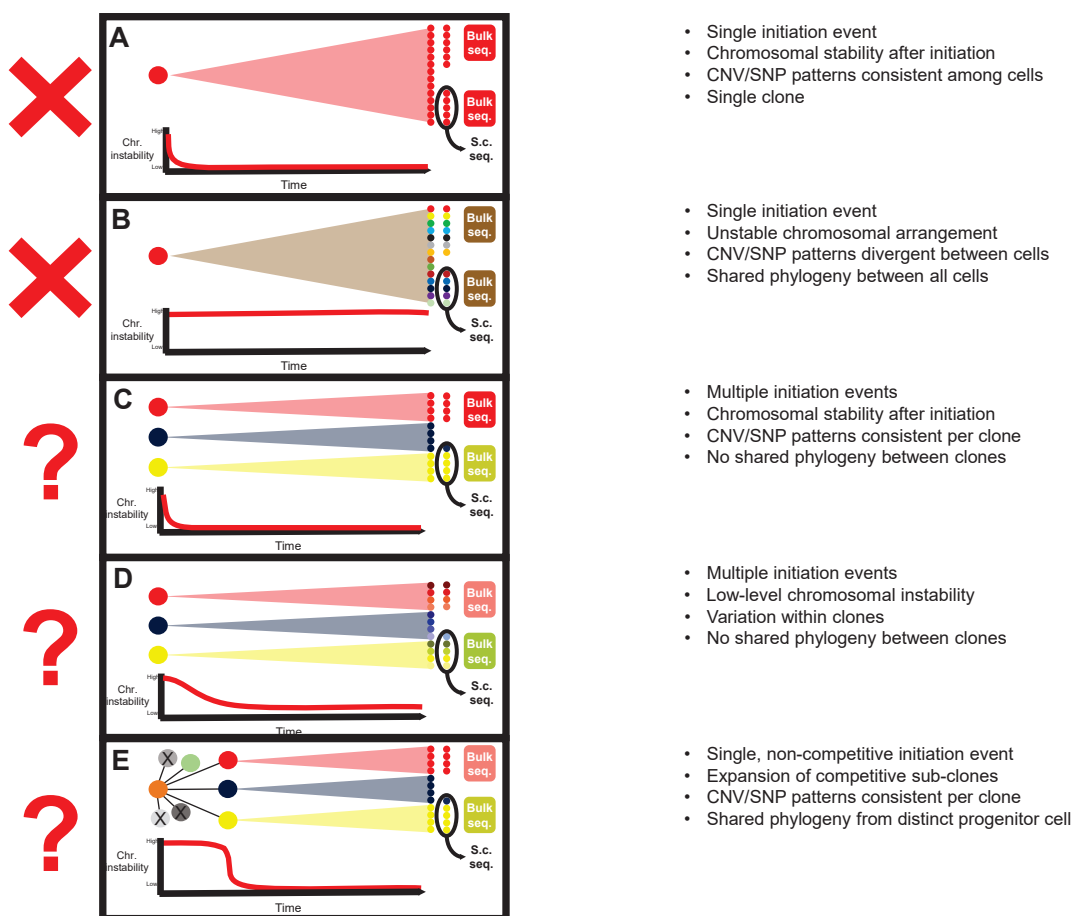

**Figure 5. Possible models for temporal SCNA stability.** (A) After tumor initiation, if chromosomal instability is low, tumors will have identical SCNA patterns across all cells. (B) High tumor instability would result in tumors with highly heterogeneous SCNA patterns across cells which may not be apparent in bulk sequencing. (C) If there are multiple initiation events with low subsequent genomic instability SCNA patterns will be consistent across clones, which will be apparent by both bulk and single cell sequencing. (D) If there are multiple initiation events with ongoing genomic instability, clones derived from each will be similar but with highly variable SCNA patterns within a clone. This heterogeneity would be apparent by single cell sequencing but not bulk sequencing. (E) If a single initiation event is followed by an initial period of genomic instability, divergent clones could emerge. Patterns of stability within a clone would suggest that chromosomal stability is re-established prior to clonal expansion.
